# Supplementary material
Source: publisher figshare collection journal article supplement (https://tandf.figshare.com/articles/dataset/_/963470)

# A Glacial Geomorphological Map of the Southernmost Ice Lobes of Patagonia

Christopher M. Darvill, Chris R. Stokes, Michael J. Bentley and Harold Lovell  
Department of Geography, Durham University, UK    E-mail: christopher.darvill@durham.ac.uk

Recommended citation: Darvill, C.M., Stokes, C.R., Bentley, M.J. & Lovell, H. 2014.  
‘A glacial geomorphological map of the southernmost ice lobes of Patagonia: the  
Bahía Inútil - San Sebastián, Magellan, Otway, Skyring and Río Gallegos lobes’, *Journal of Maps*

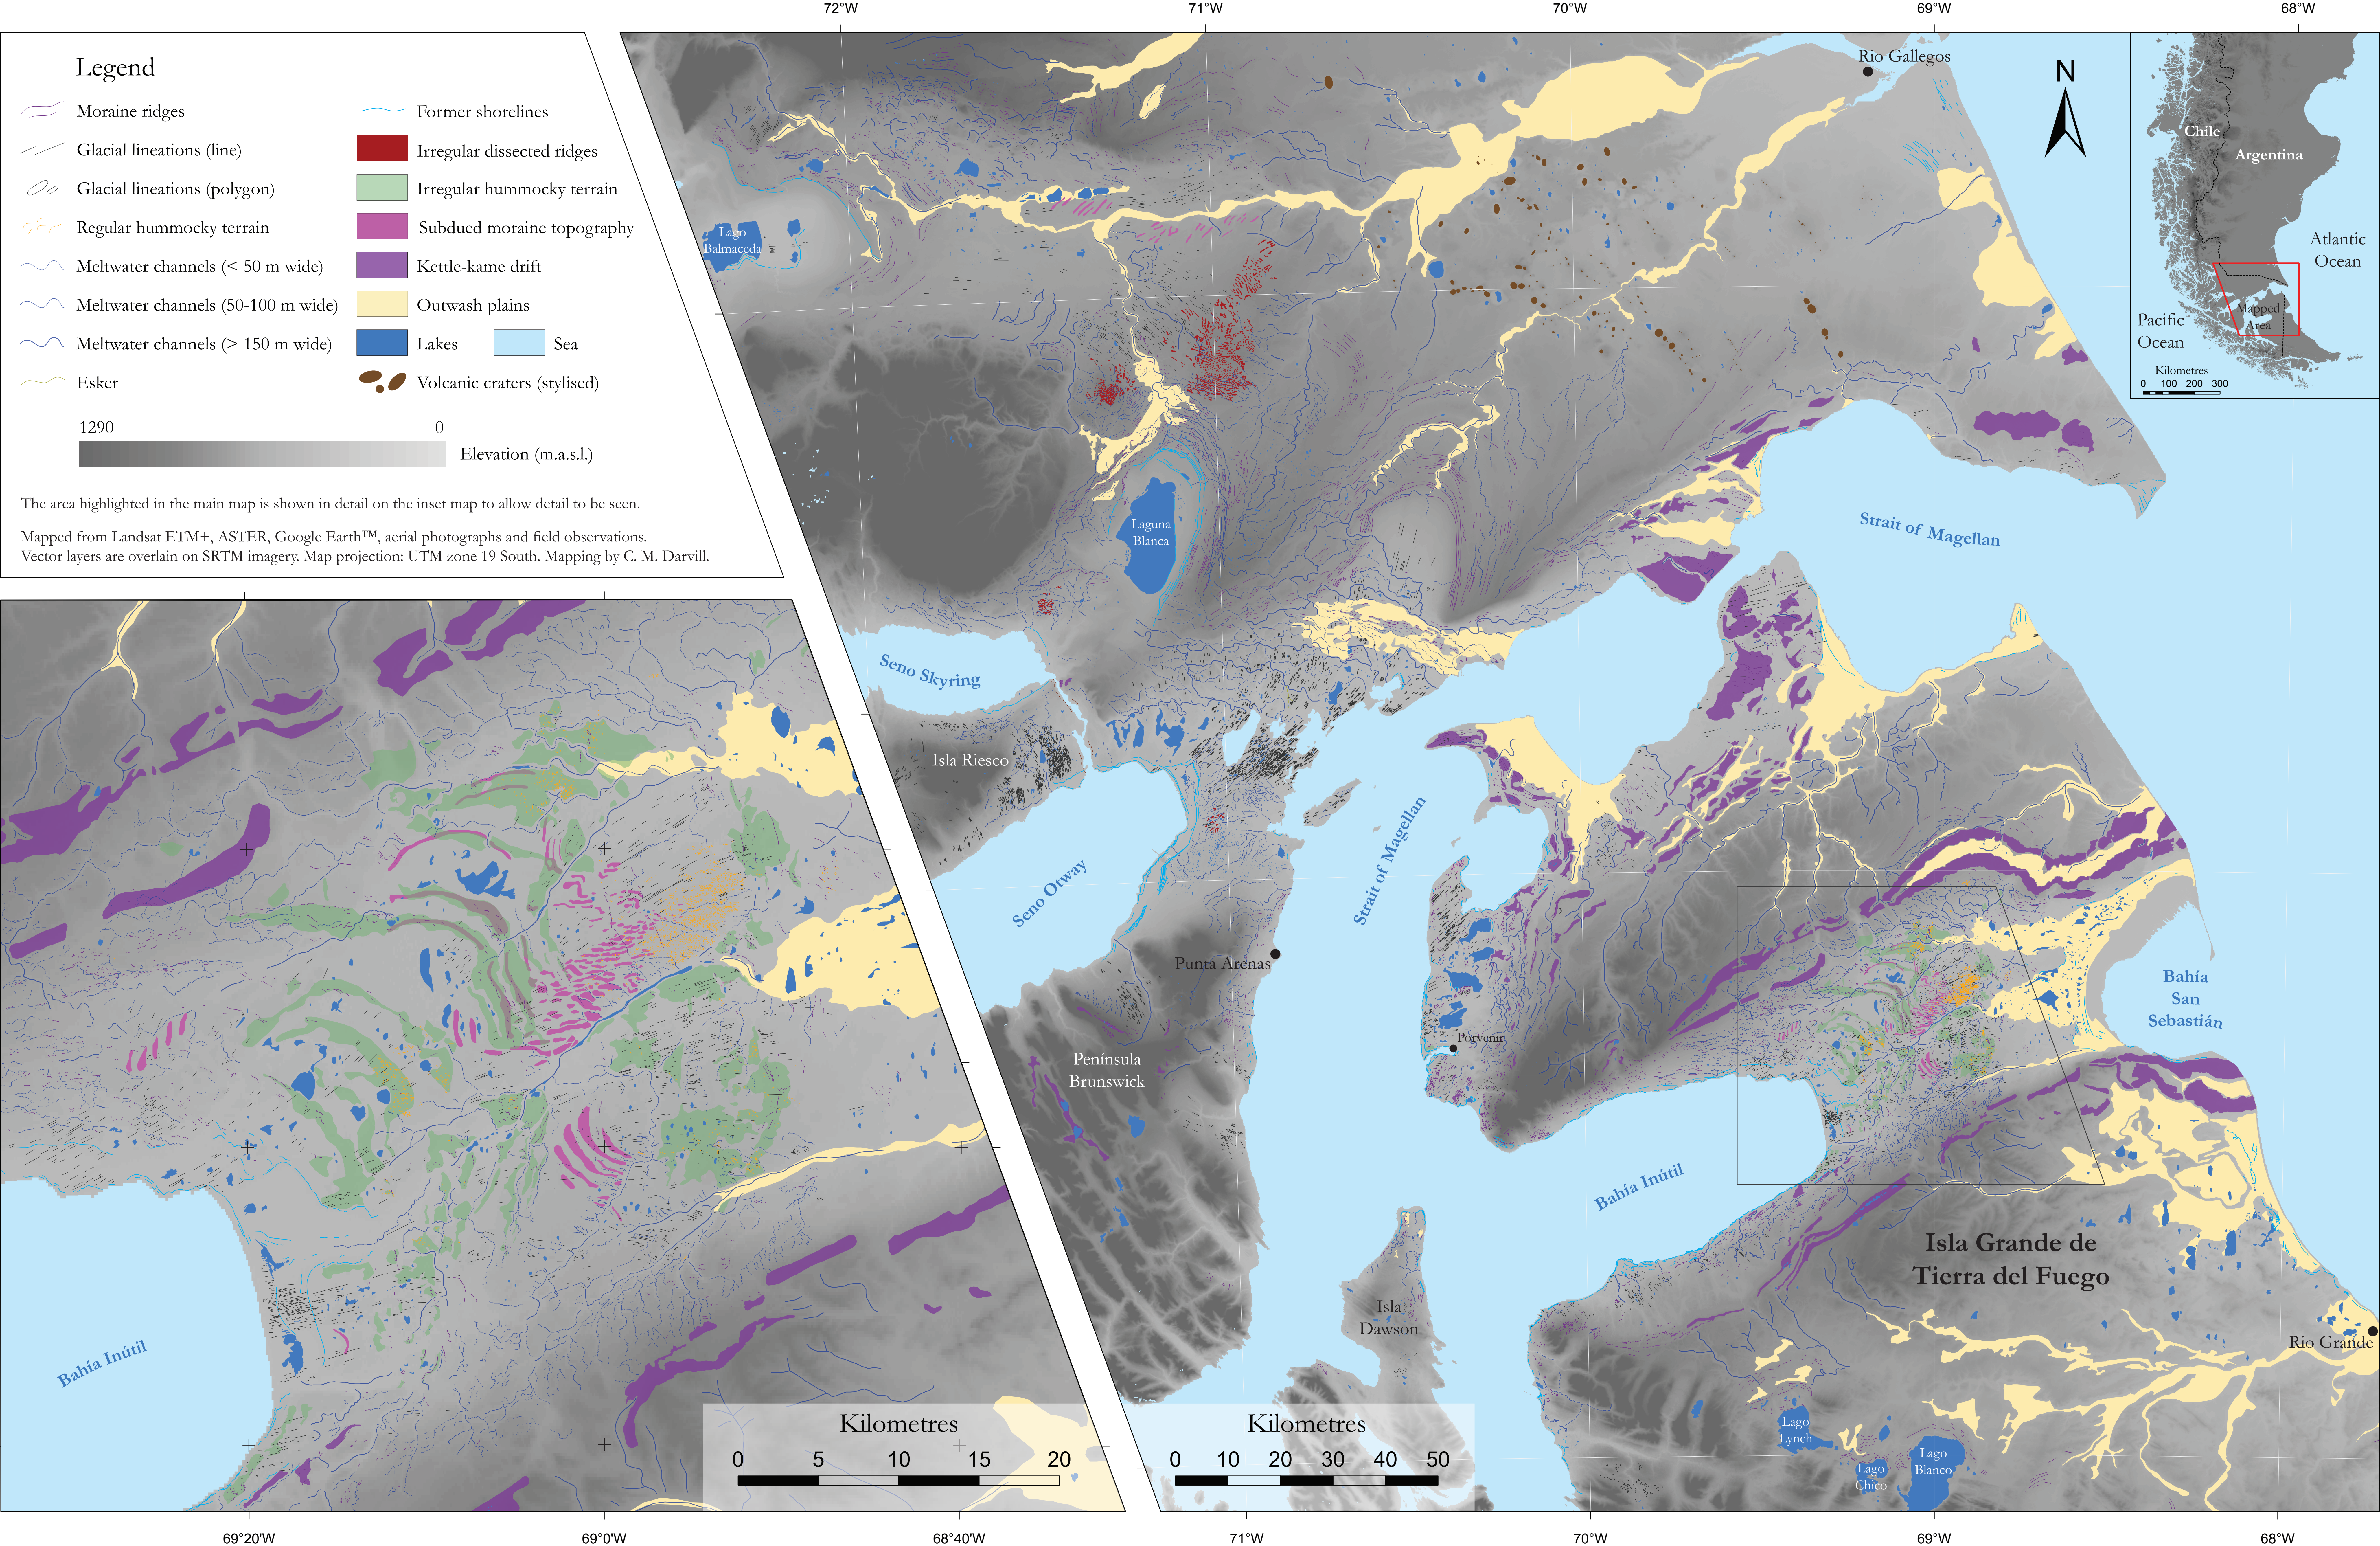

Supplement: Supplementary file 1 [file 1]
